# Supplementary material for: PNPCB heterocycles via thermal and Lewis acid catalyzed trans-hydroborations
Source: Royal Society of Chemistry journal article supplement (doi:10.1039/c6dt01659f), 2016-01-01
Supplement: c6dt01659f1.pdf [file c6dt01659f1.pdf]

Supporting information for:

PNPCB Heterocycles via Thermal and Lewis Acid Catalyzed  
*trans*-Hydroborations

Louie Fan, Douglas W. Stephan\*

Department of Chemistry, University of Toronto, Toronto, ON M5S 3H6 Canada

**Index**

|                                           |              |
|-------------------------------------------|--------------|
| <b>1) NMR Spectra for compounds 8-15</b>  | <b>2-17</b>  |
| <b>2) Tables of Crystallographic Data</b> | <b>18-19</b> |

## 1. NMR Spectra

Figure 1  $^1\text{H}$  NMR spectrum of **8** (400 MHz,  $d_6$ -benzene, 298K).

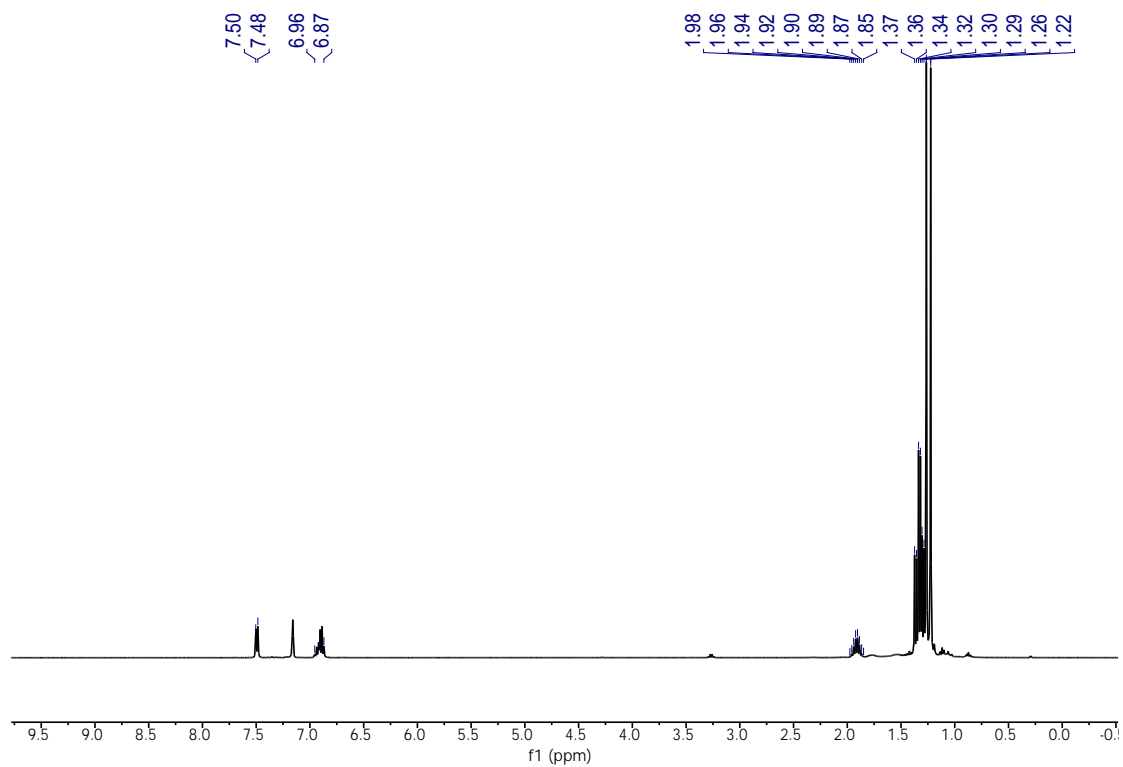

Figure 2  $^{13}\text{C}$  NMR spectrum of **8** (100 MHz,  $d_6$ -benzene, 298K).

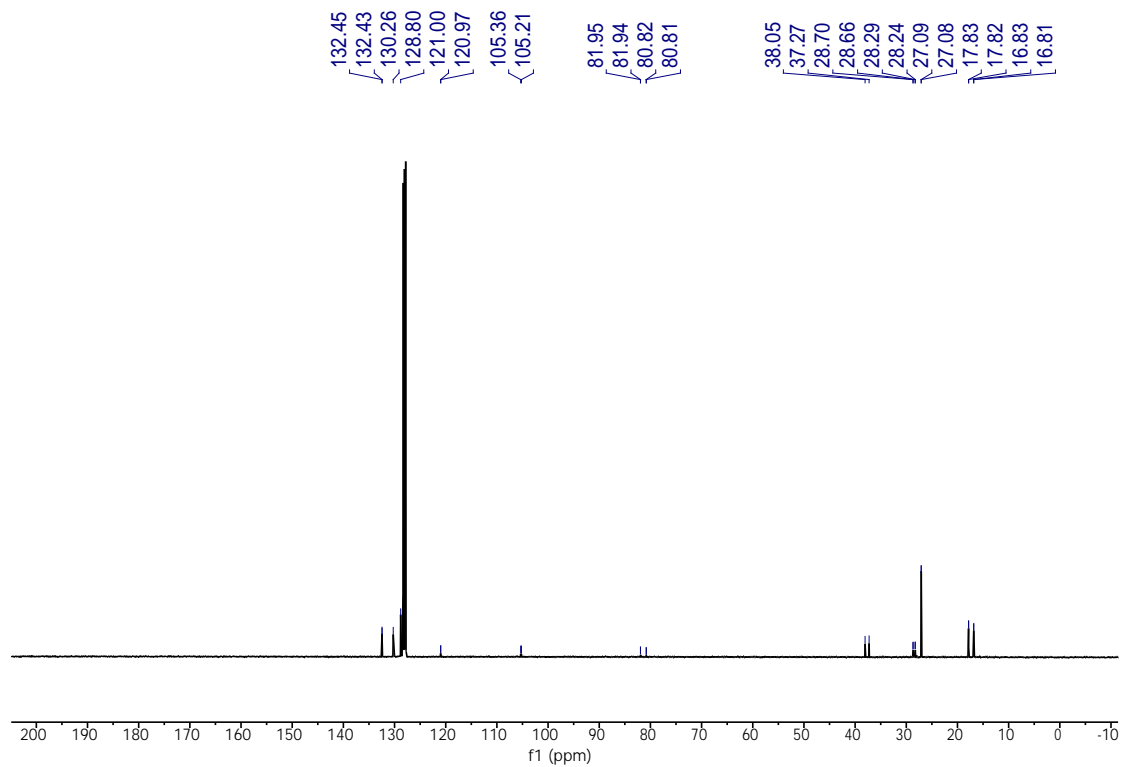

**Figure 3**  $^{31}\text{P}$  NMR spectrum of **8** (162 MHz,  $d_6$ -benzene, 298K).

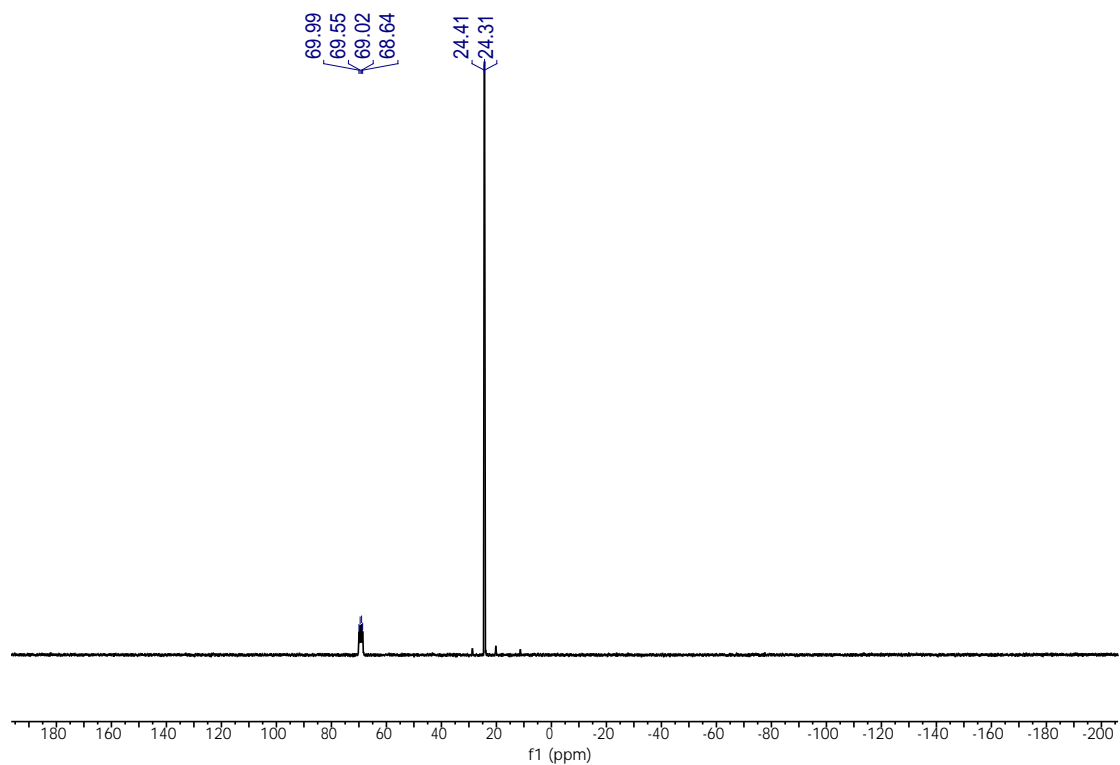

**Figure 4**  $^{11}\text{B}$  NMR spectrum of **8** (128 MHz,  $d_6$ -benzene, 298K).

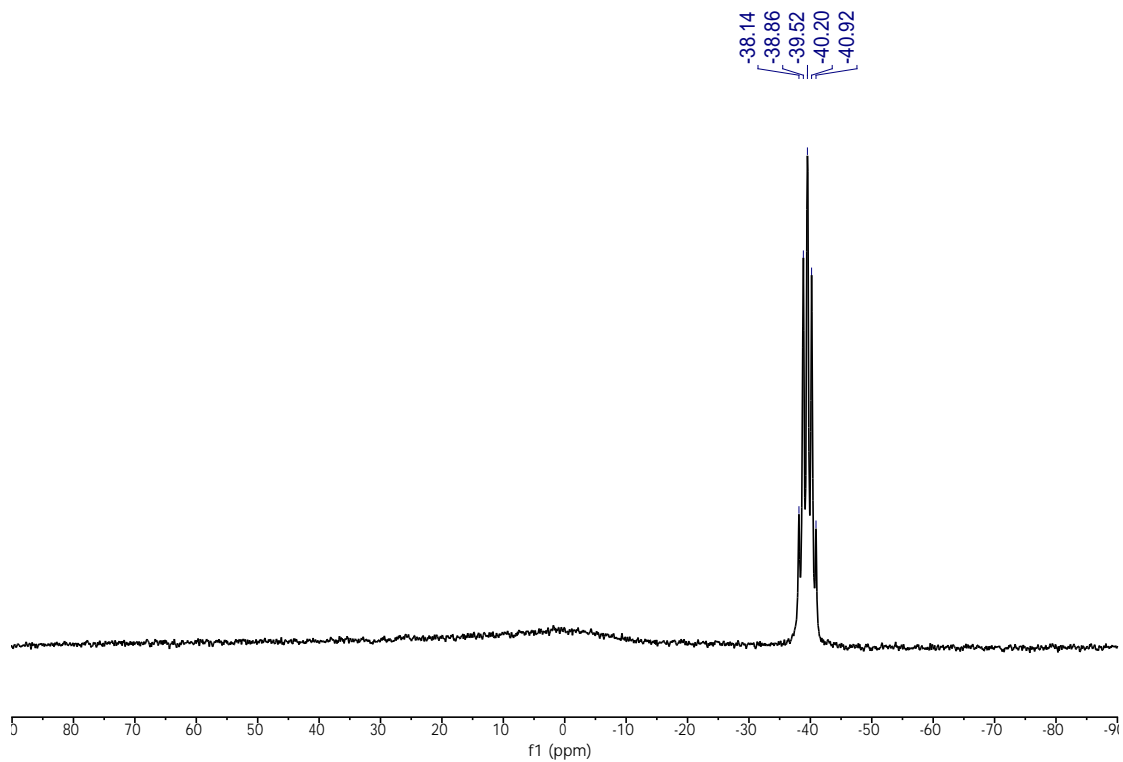

Figure 5  $^1\text{H}$  NMR spectrum of **9** (400 MHz,  $d_6$ -benzene, 298K)

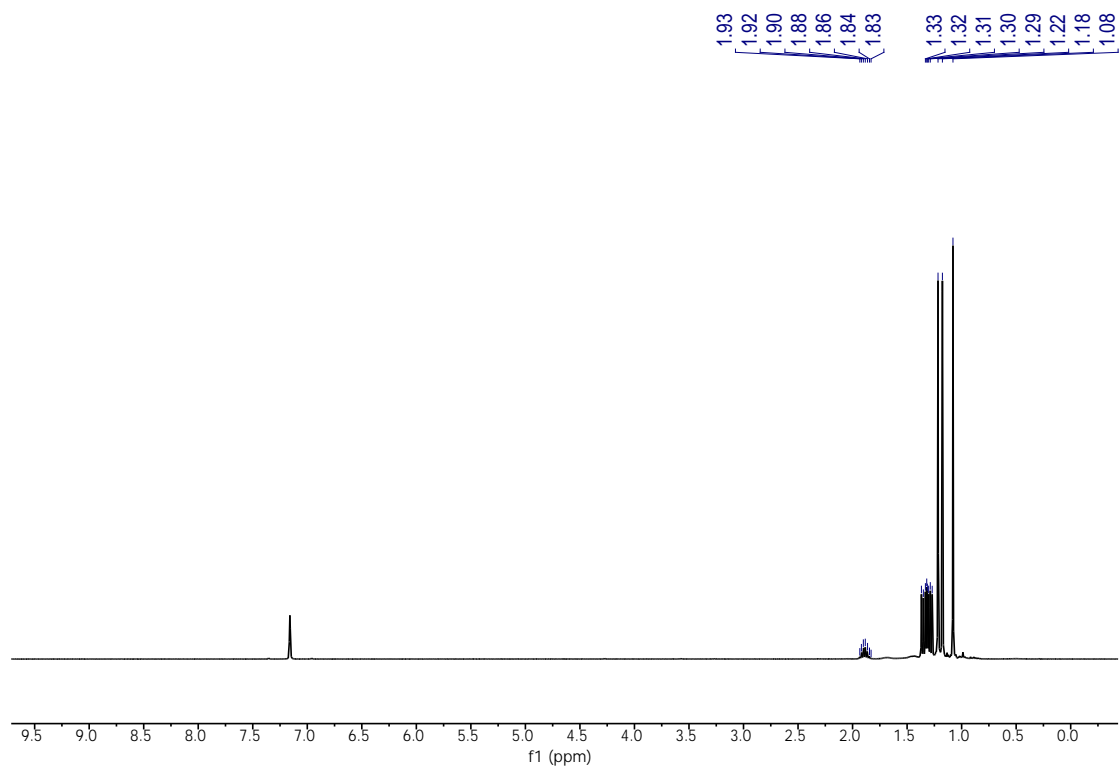

Figure 6  $^{13}\text{C}$  NMR spectrum of **9** (100 MHz,  $d_6$ -benzene, 298K)

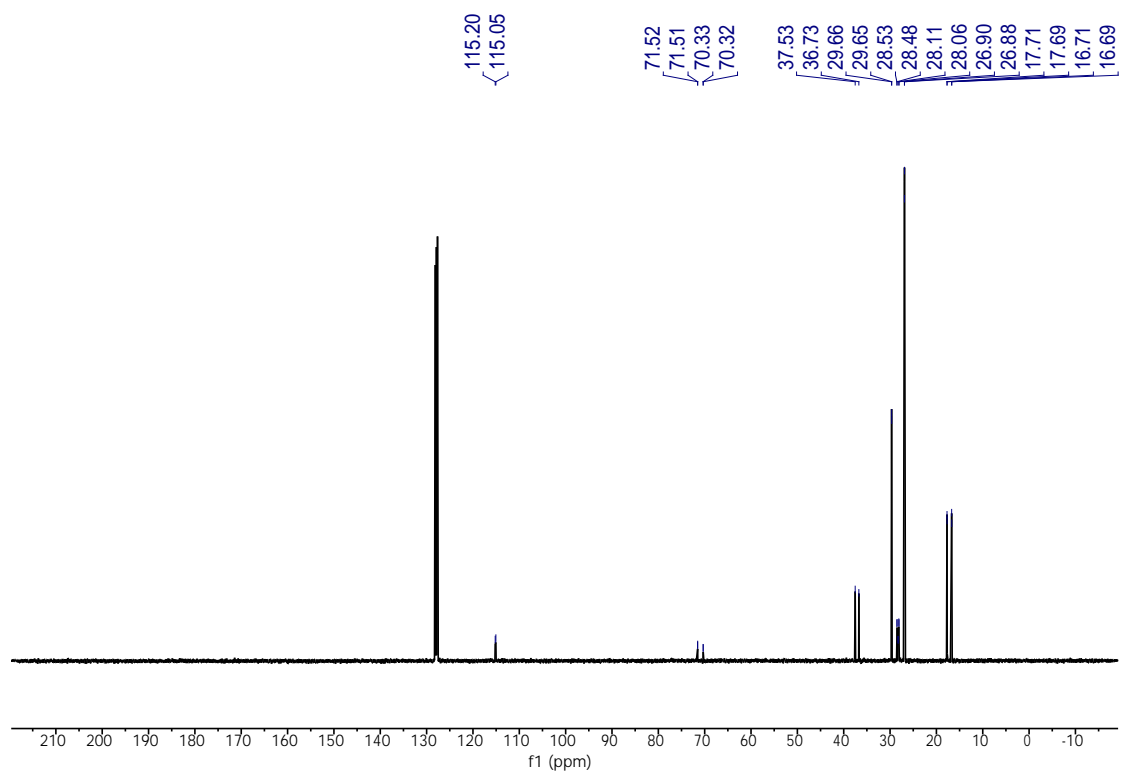

Figure 7  $^{31}\text{P}$  NMR spectrum of **9** (162 MHz,  $d_6$ -benzene, 298K)

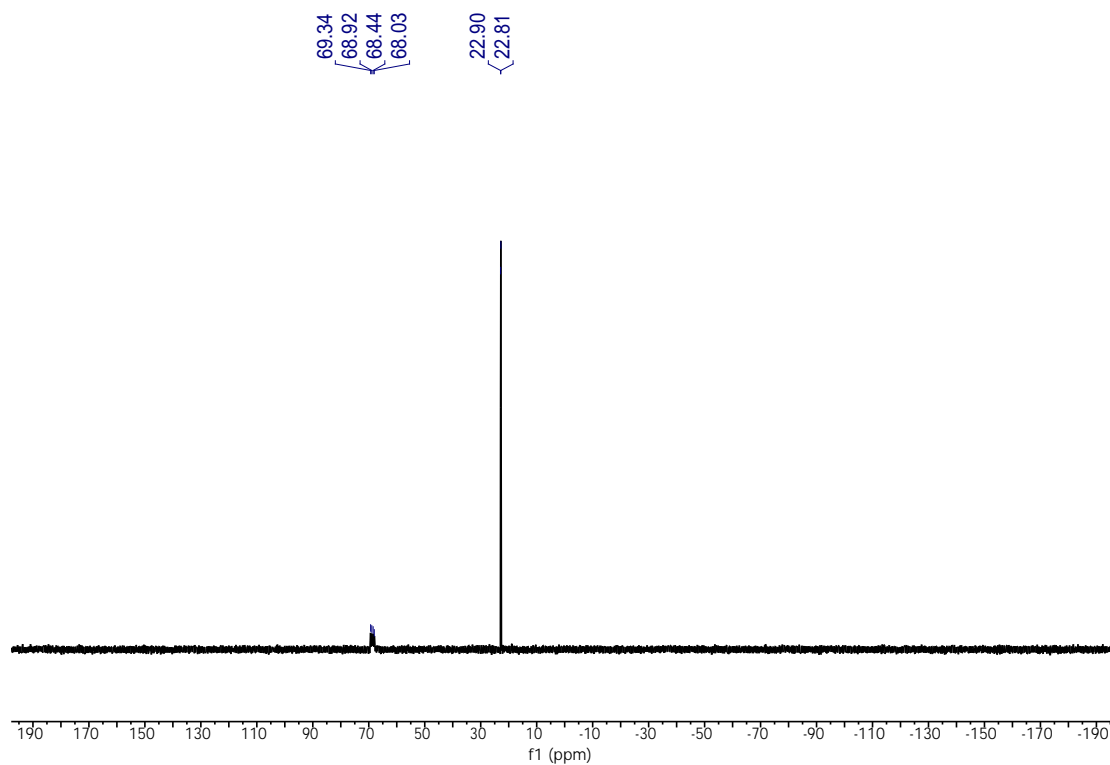

Figure 8  $^{11}\text{B}$  NMR spectrum of **9** (128 MHz,  $d_6$ -benzene, 298K)

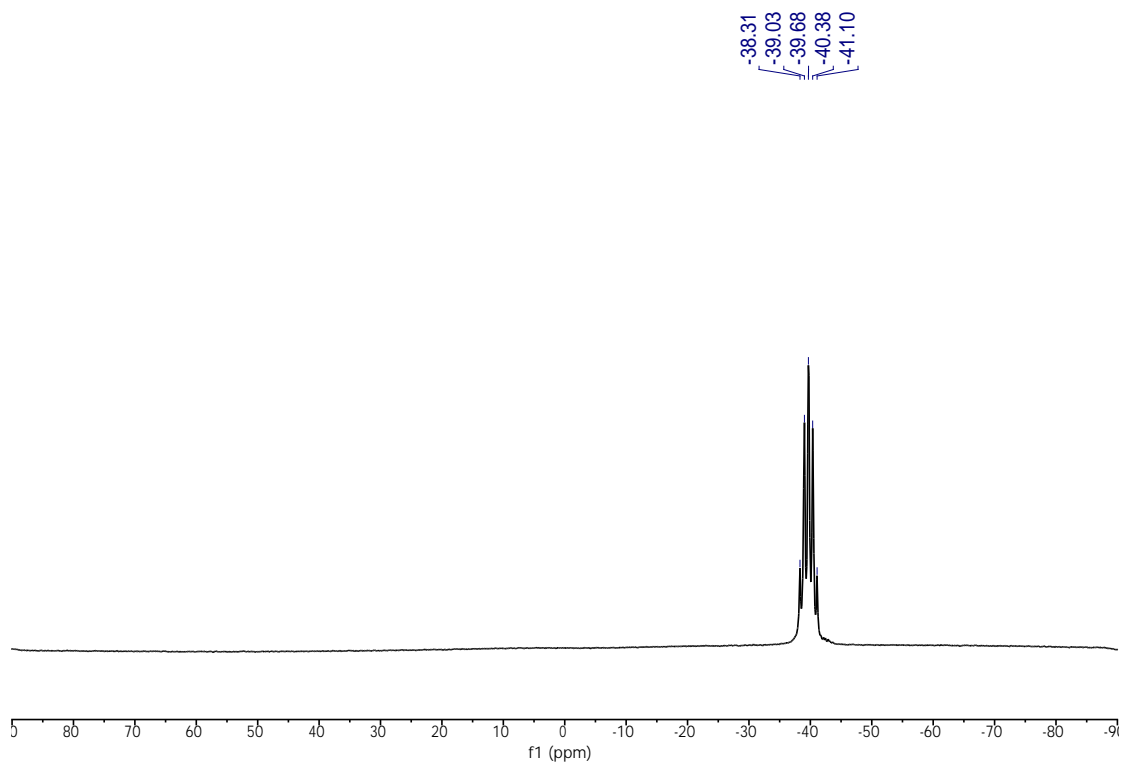

Figure 9  $^1\text{H}$  NMR spectrum of **10** (400MHz,  $d_6$ -benzene, 298K)

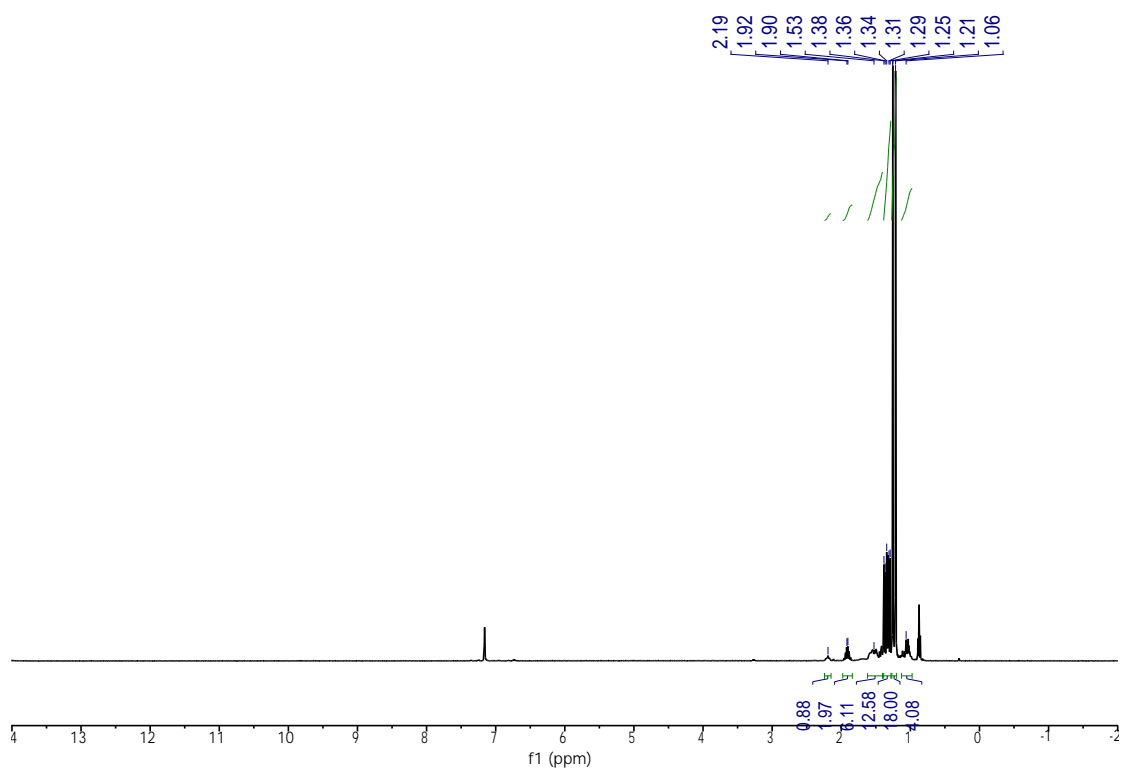

Figure 10  $^{13}\text{C}$  NMR spectrum of **10** (100 MHz,  $d_6$ -benzene, 298K)

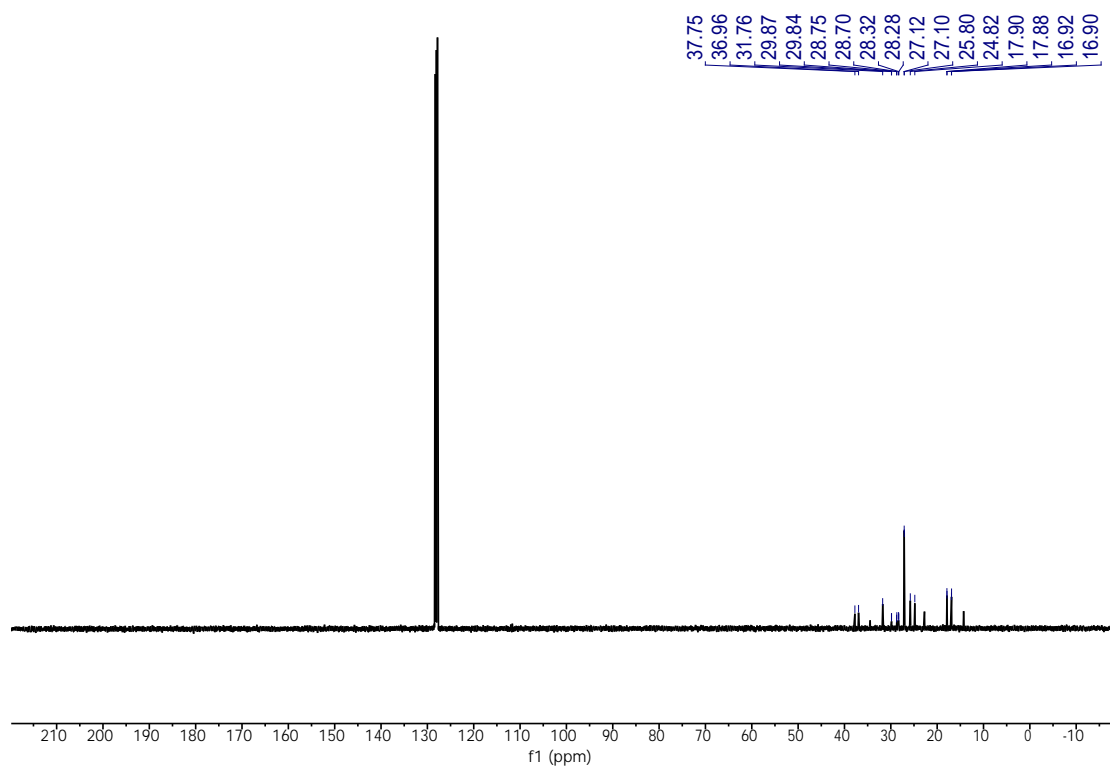

Figure 11  $^{31}\text{P}$  NMR spectrum of **10** (162 MHz,  $d_6$ -benzene, 298K)

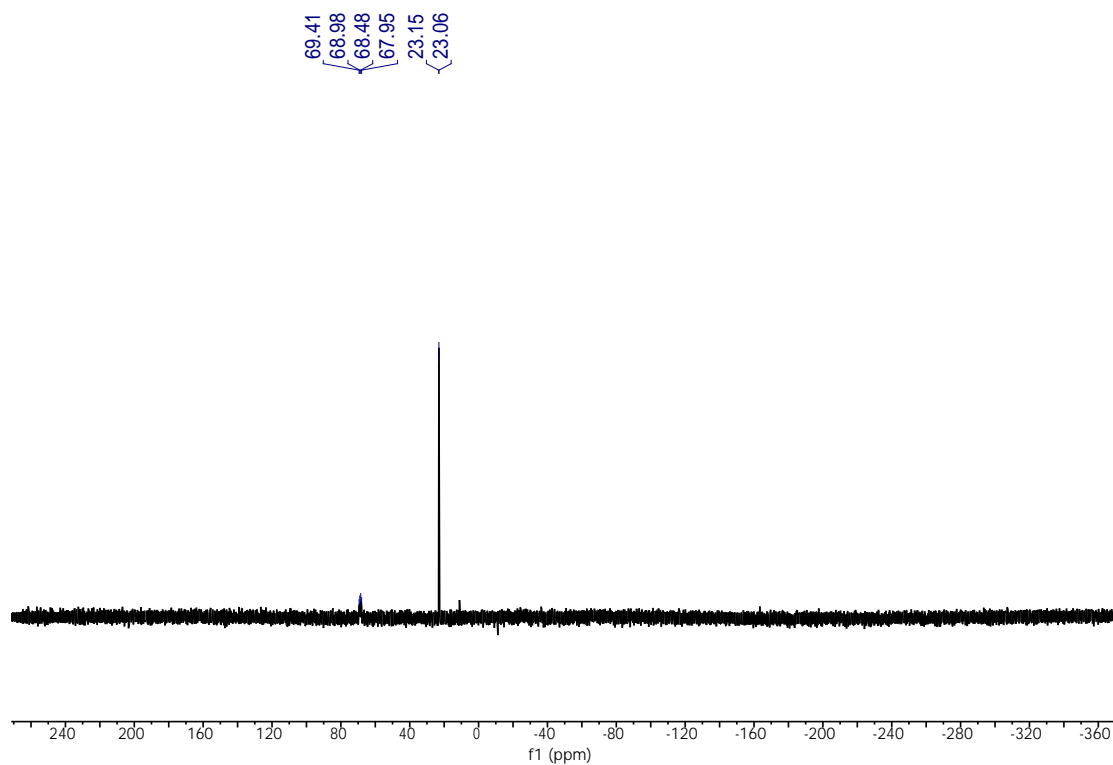

Figure 12  $^{11}\text{B}$  NMR spectrum of **10** (128MHz,  $d_6$ -benzene, 298K)

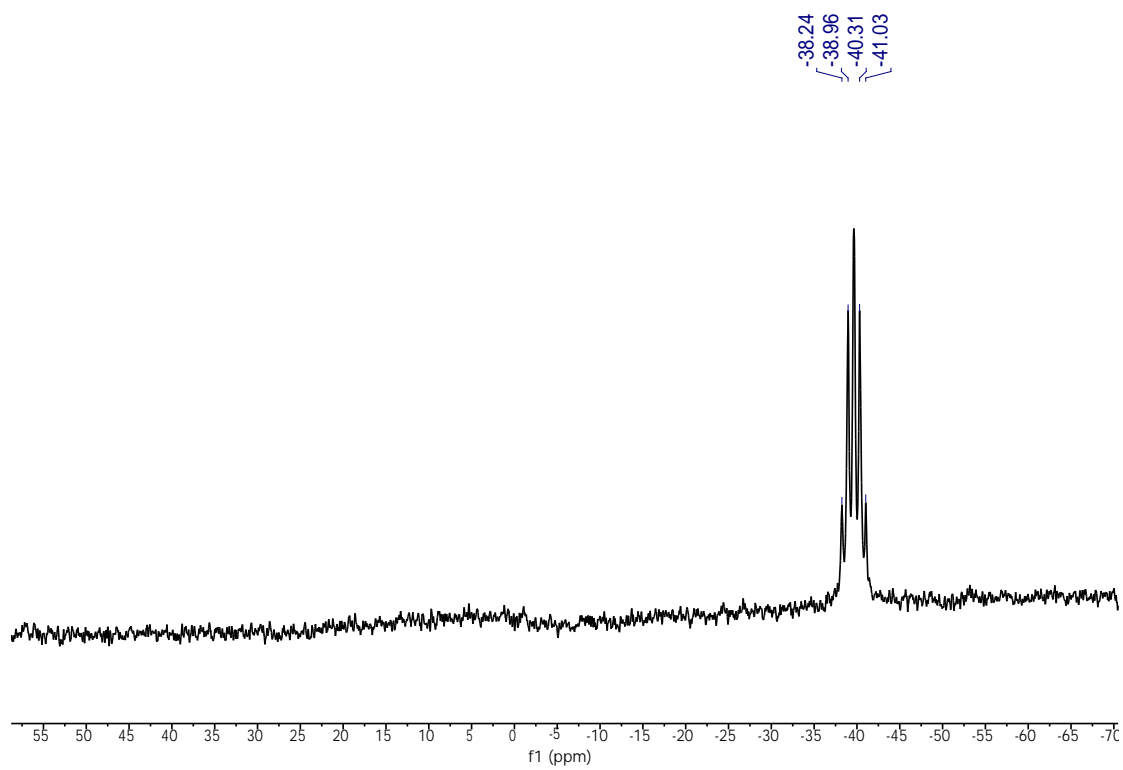

Figure 13  $^1\text{H}$  NMR spectrum of **11** (400MHz,  $d_6$ -benzene, 298K)

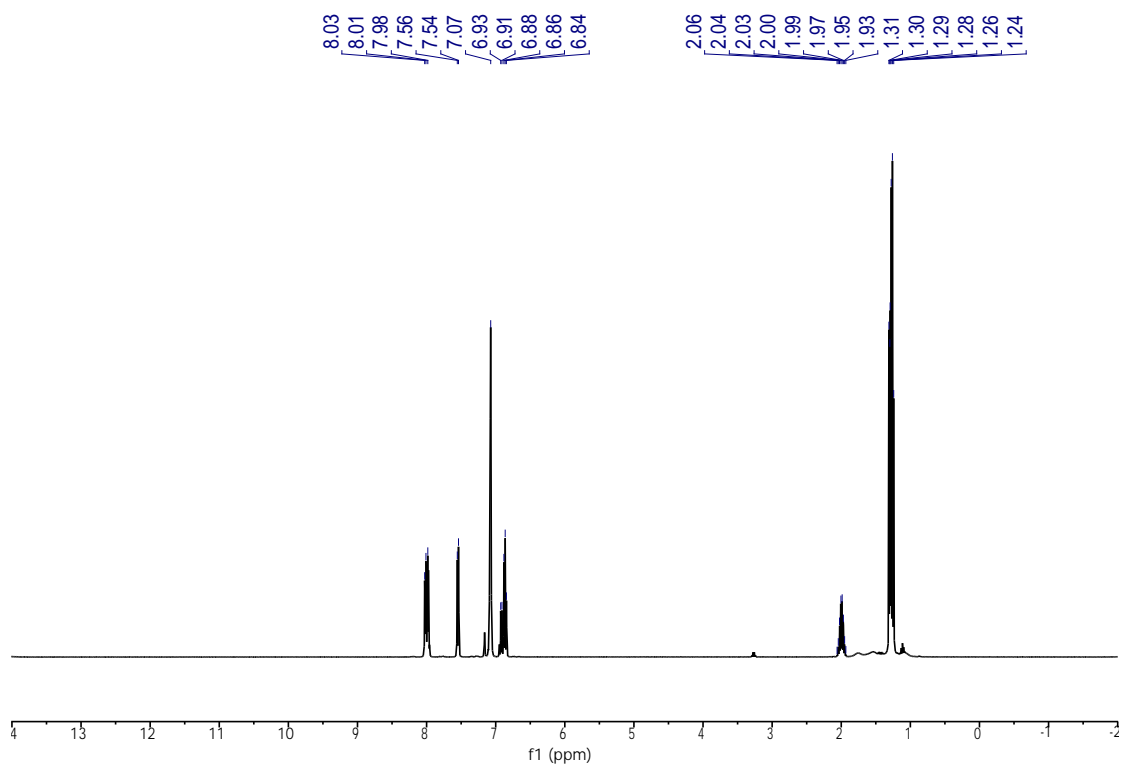

Figure 14  $^{13}\text{C}$  NMR spectrum of **11** (100 MHz,  $d_6$ -benzene, 298K)

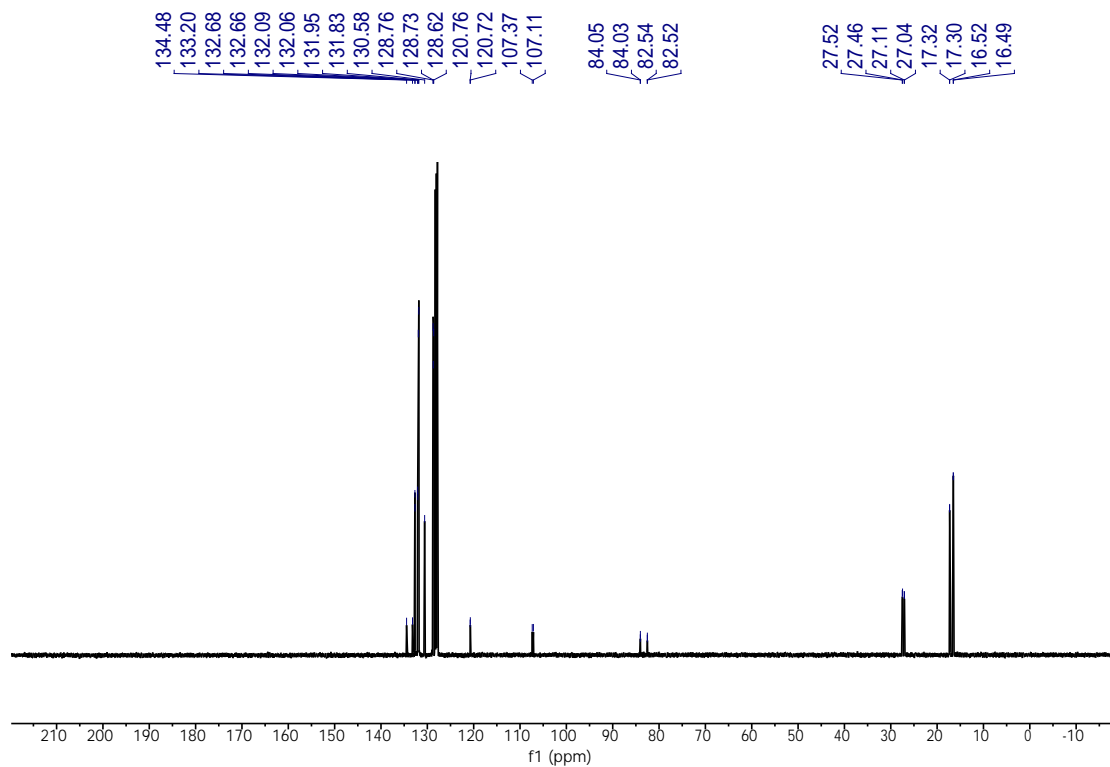



Figure 15  $^{31}\text{P}$  NMR spectrum of **11** (162 MHz,  $d_6$ -benzene, 298K)

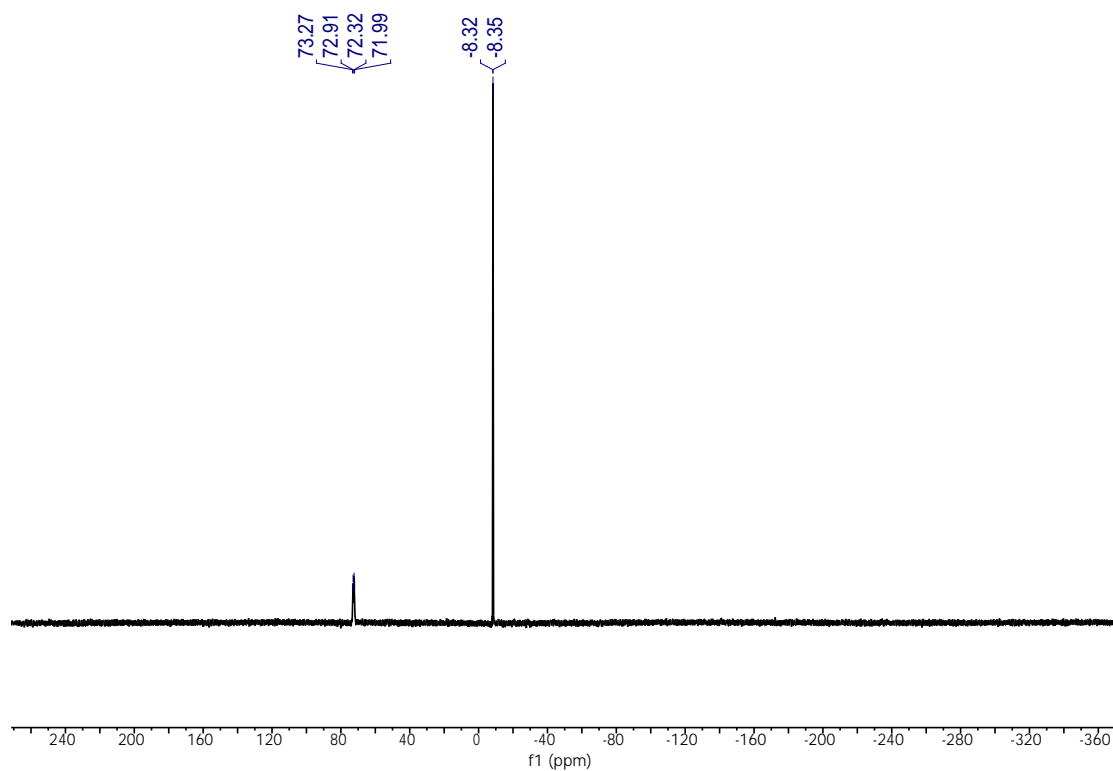

Figure 16  $^{11}\text{B}$  NMR spectrum of **11** (128MHz,  $d_6$ -benzene, 298K)

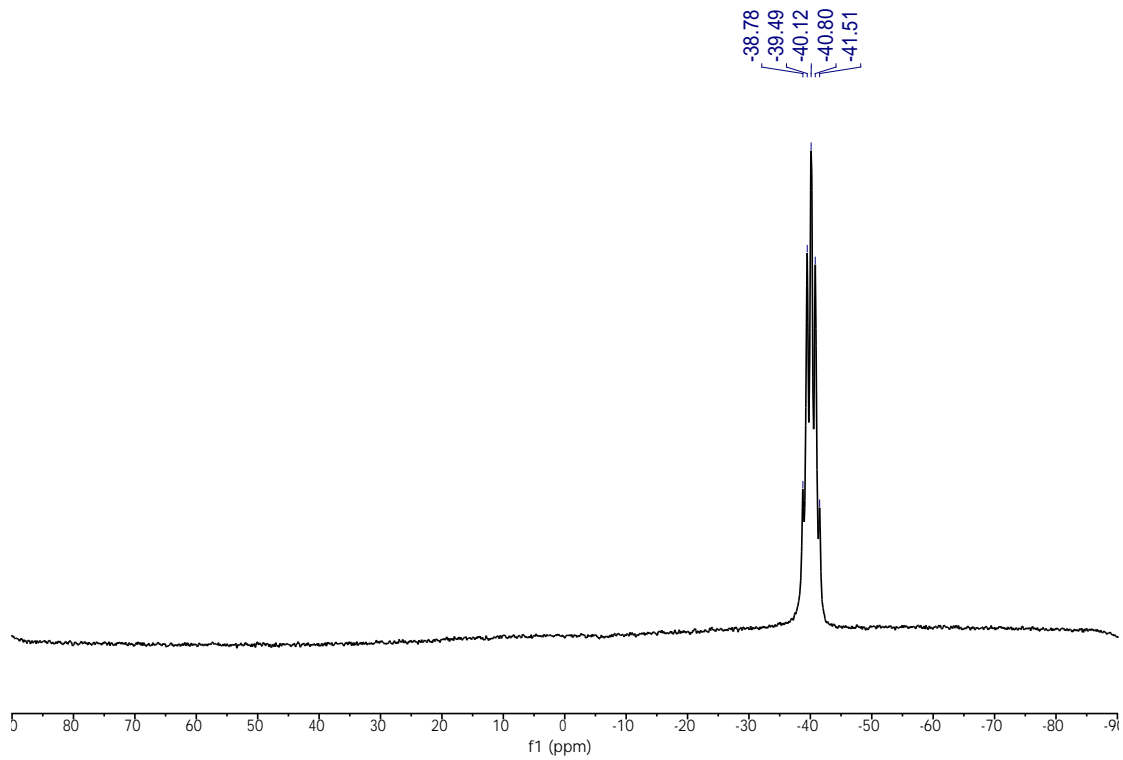

Figure 17  $^1\text{H}$  NMR spectrum of **12** (400MHz,  $d_6$ -benzene, 298K)

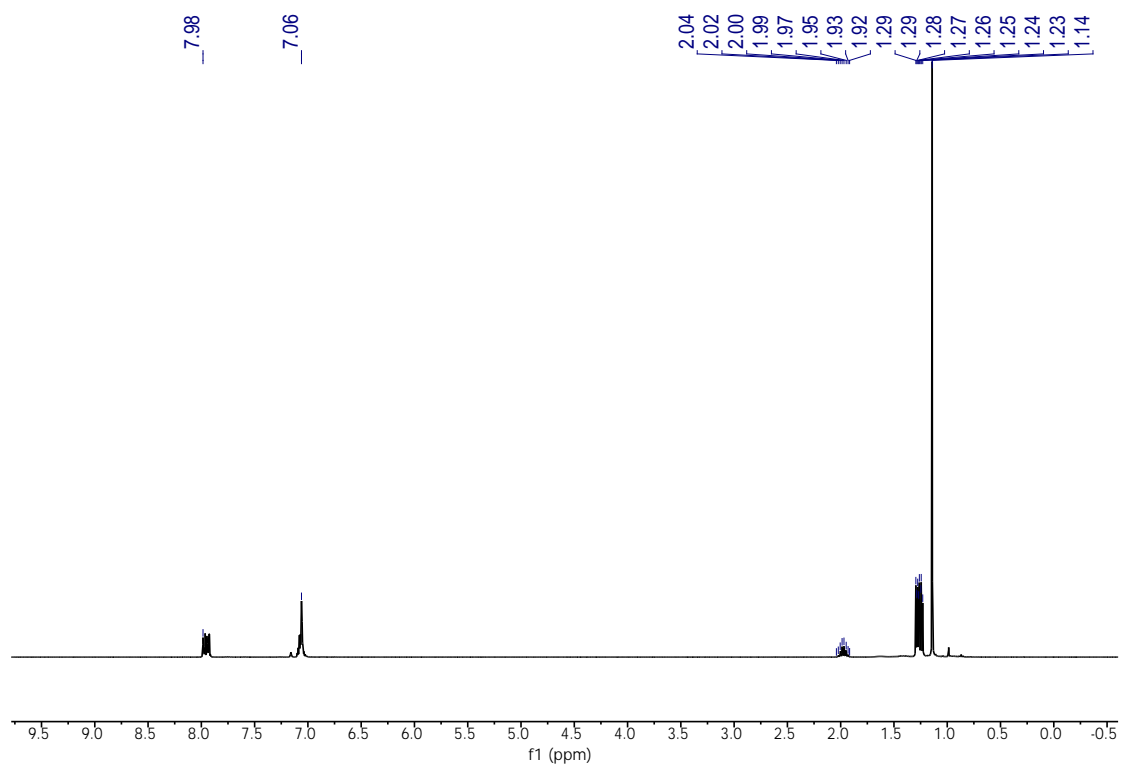

Figure 18  $^{13}\text{C}$  NMR spectrum of **12** (100 MHz,  $d_6$ -benzene, 298K)

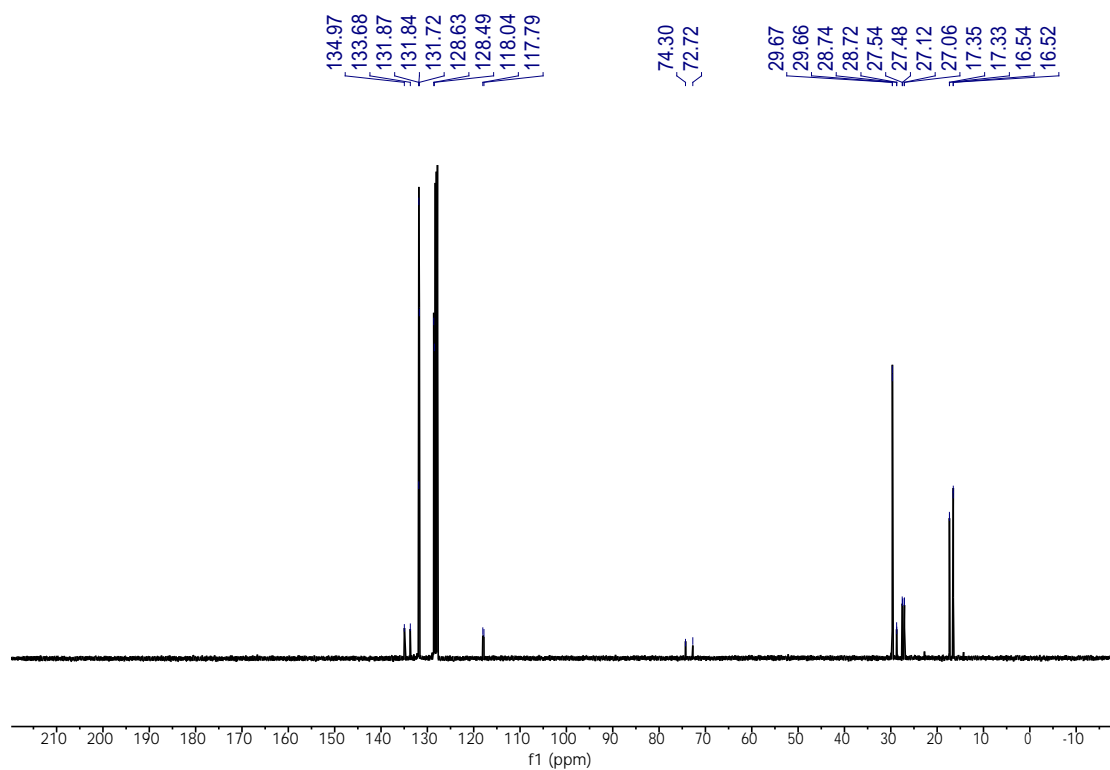

Figure 19  $^{31}\text{P}$  NMR spectrum of **12** (162 MHz,  $d_6$ -benzene, 298K)

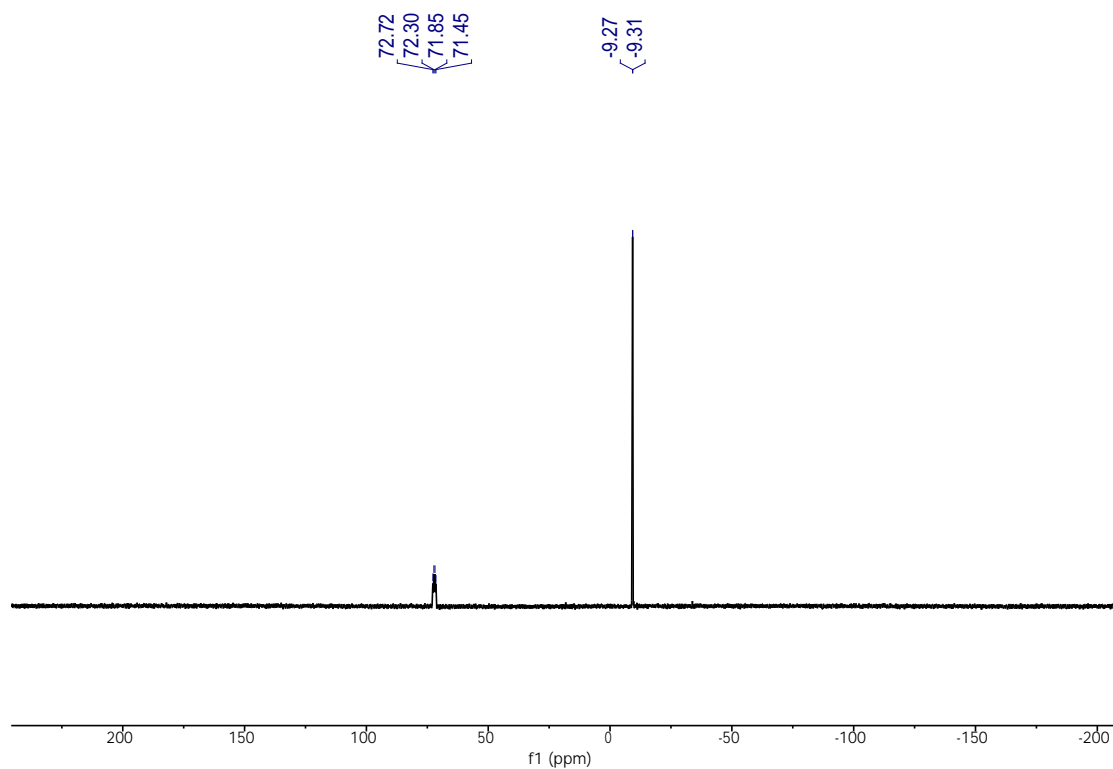

Figure 20  $^{11}\text{B}$  NMR spectrum of **12** (128MHz,  $d_6$ -benzene, 298K)

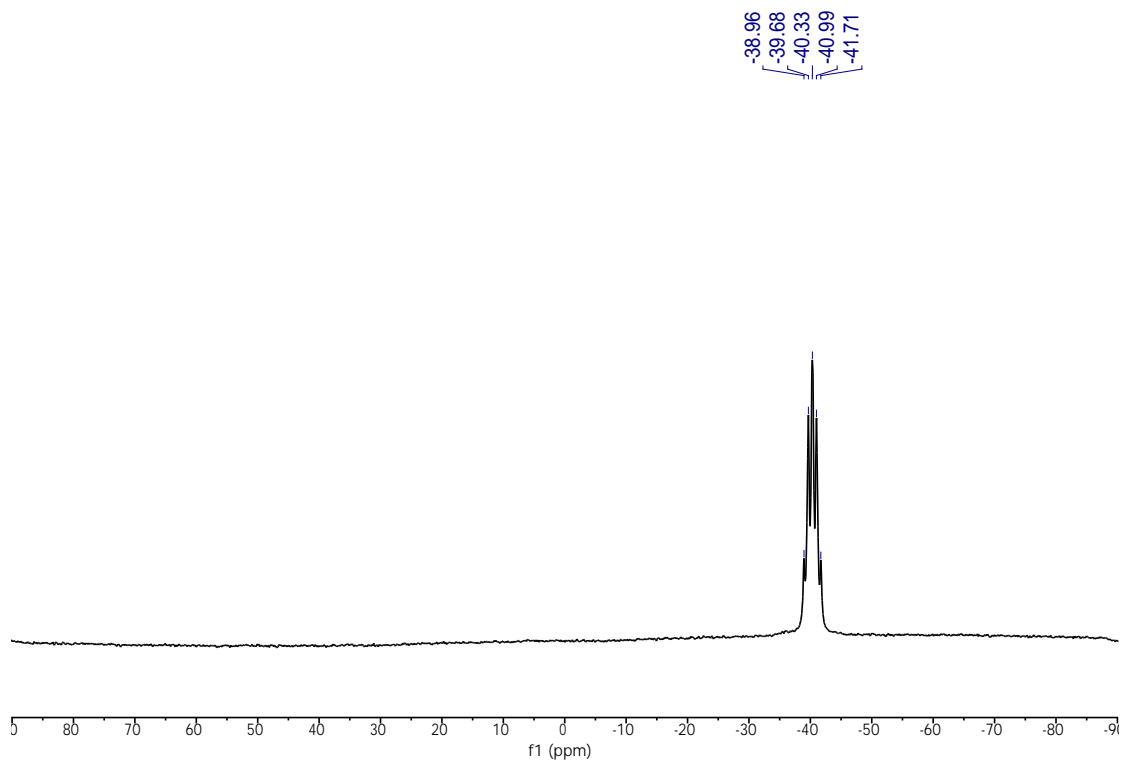

Figure 21  $^1\text{H}$  NMR spectrum of **13** (400MHz,  $d_6$ -benzene, 298K)

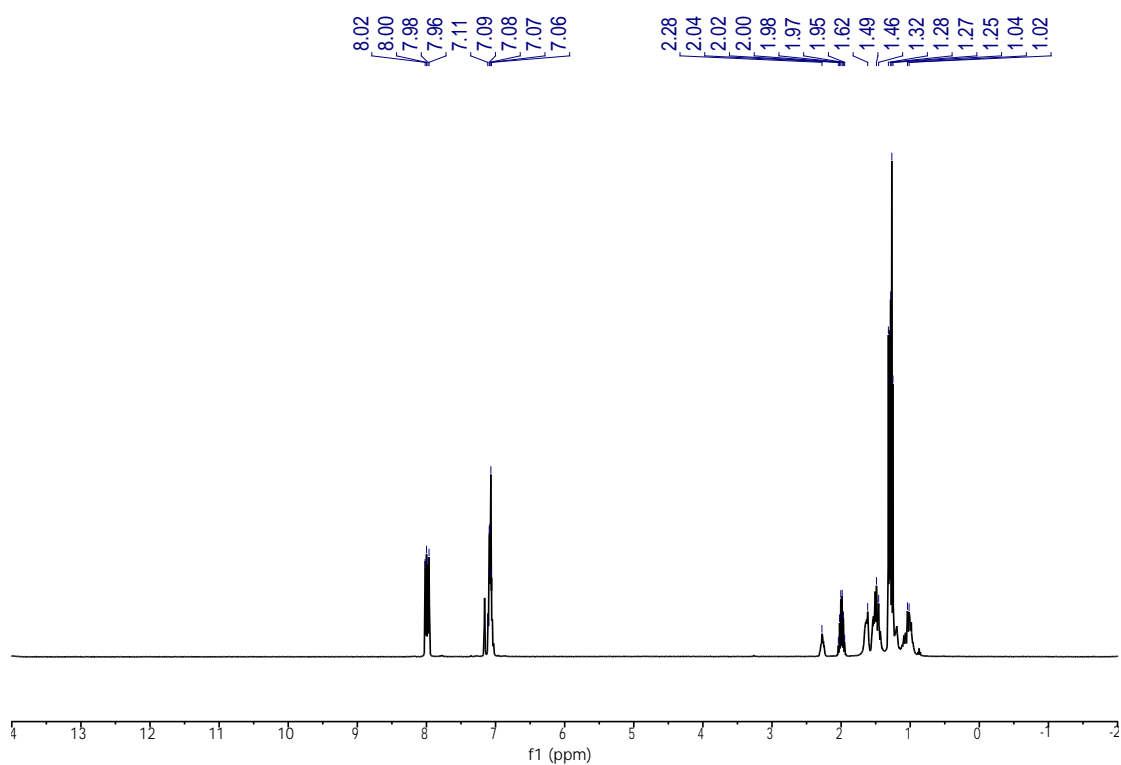

Figure 22  $^{13}\text{C}$  NMR spectrum of **13** (100 MHz,  $d_6$ -benzene, 298K)

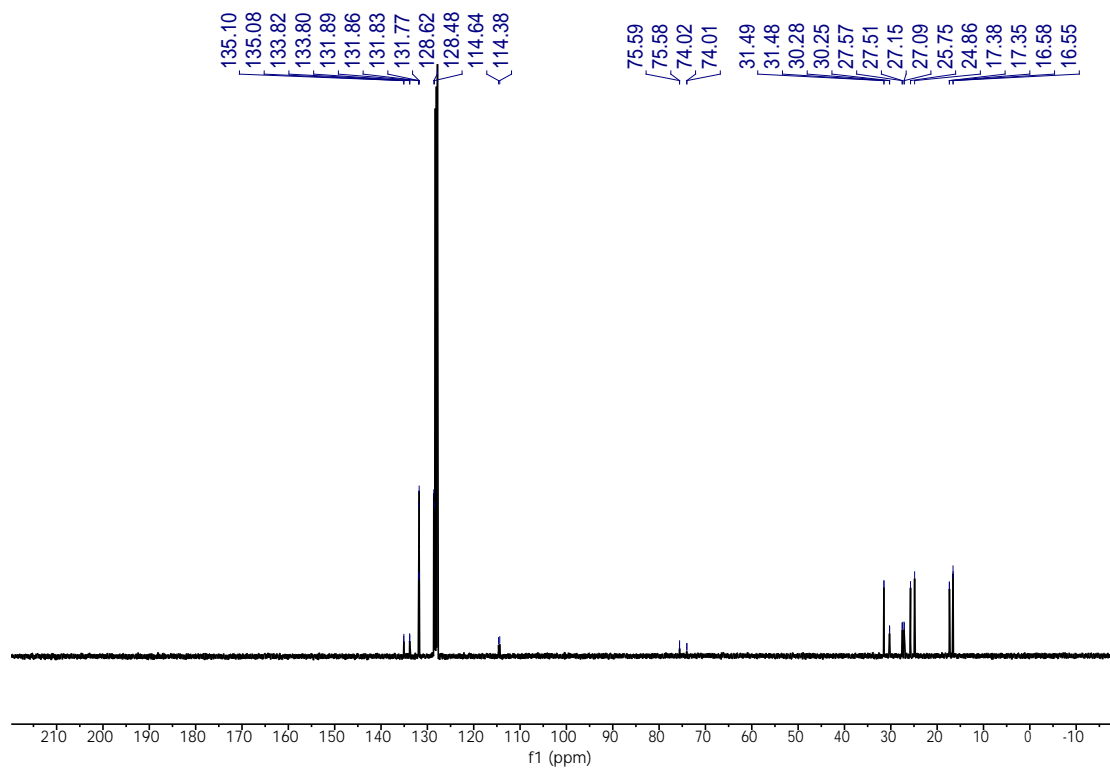

Figure 23  $^{31}\text{P}$  NMR spectrum of **13** (162 MHz,  $d_6$ -benzene, 298K)

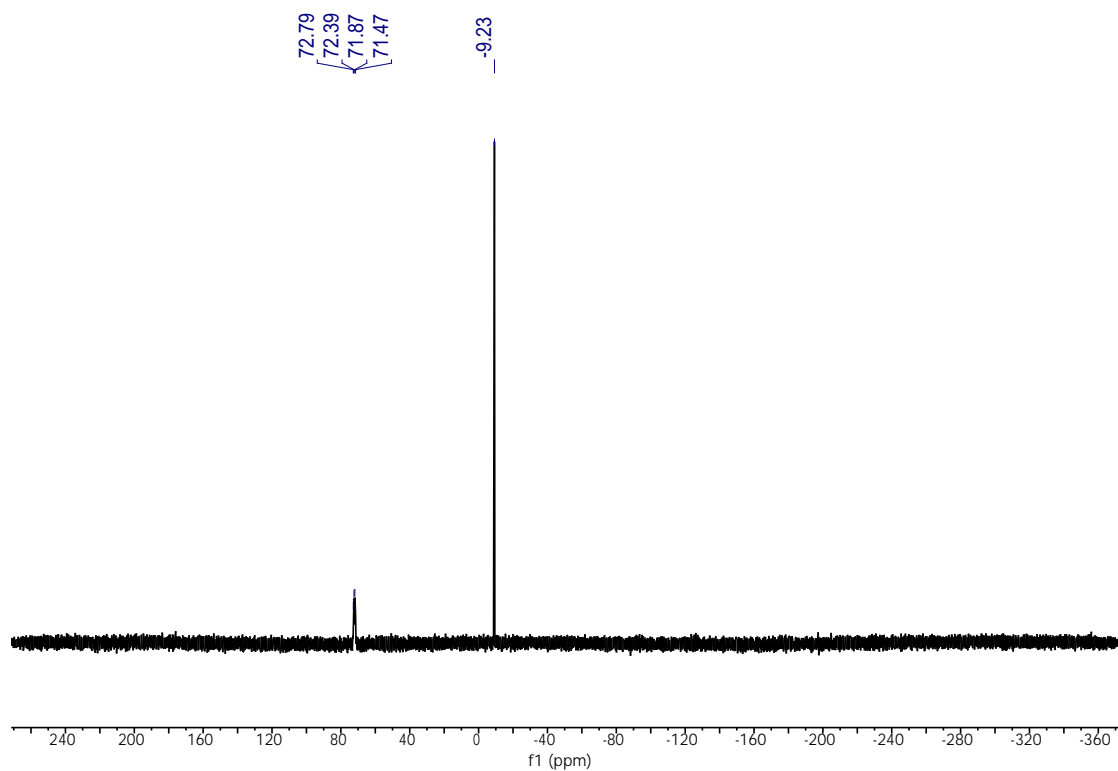

Figure 24  $^{11}\text{B}$  NMR spectrum of **13** (128MHz,  $d_6$ -benzene, 298K)

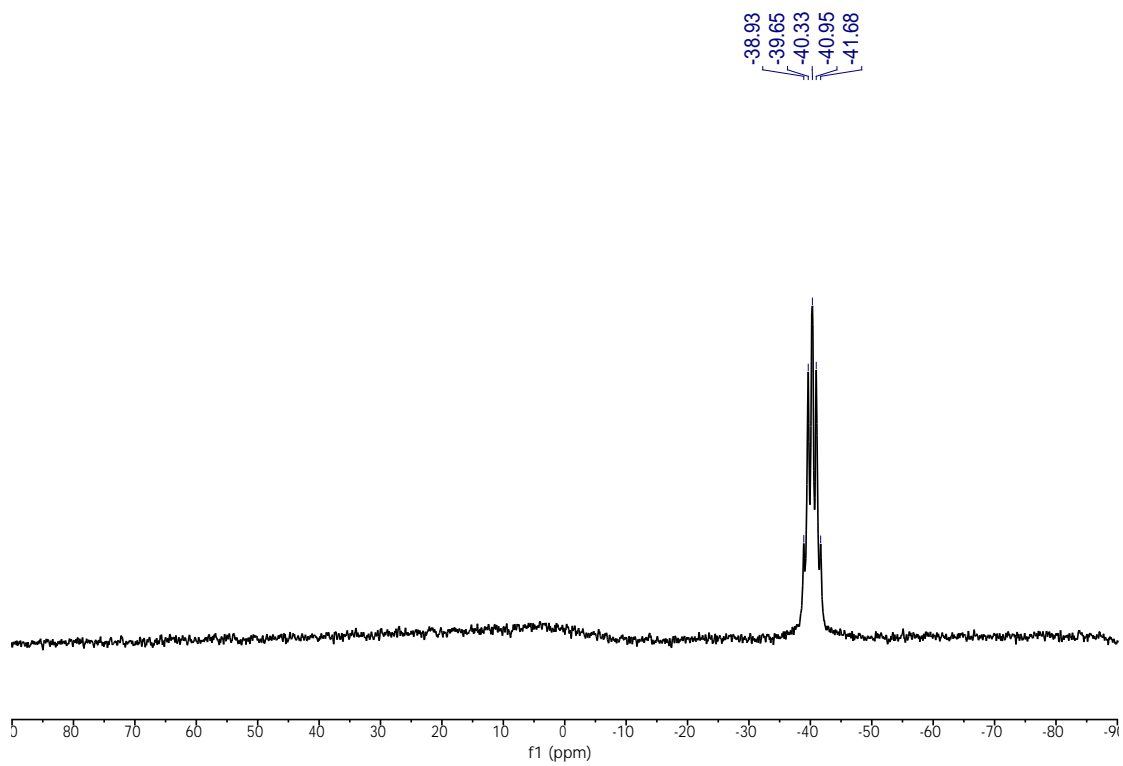

Figure 25  $^1\text{H}$  NMR spectrum of **14** (100 MHz,  $d_6$ -benzene, 298K)

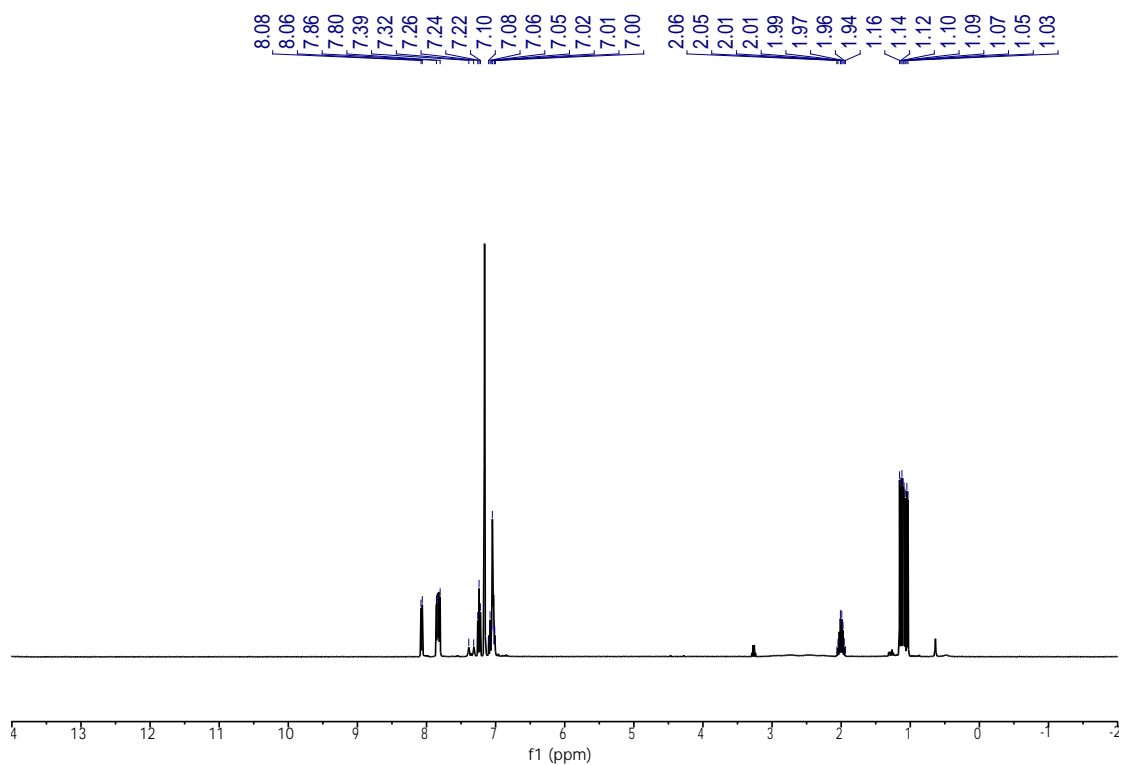

Figure 26  $^{13}\text{C}$  NMR spectrum of **14** (100 MHz,  $d_6$ -benzene, 298K)

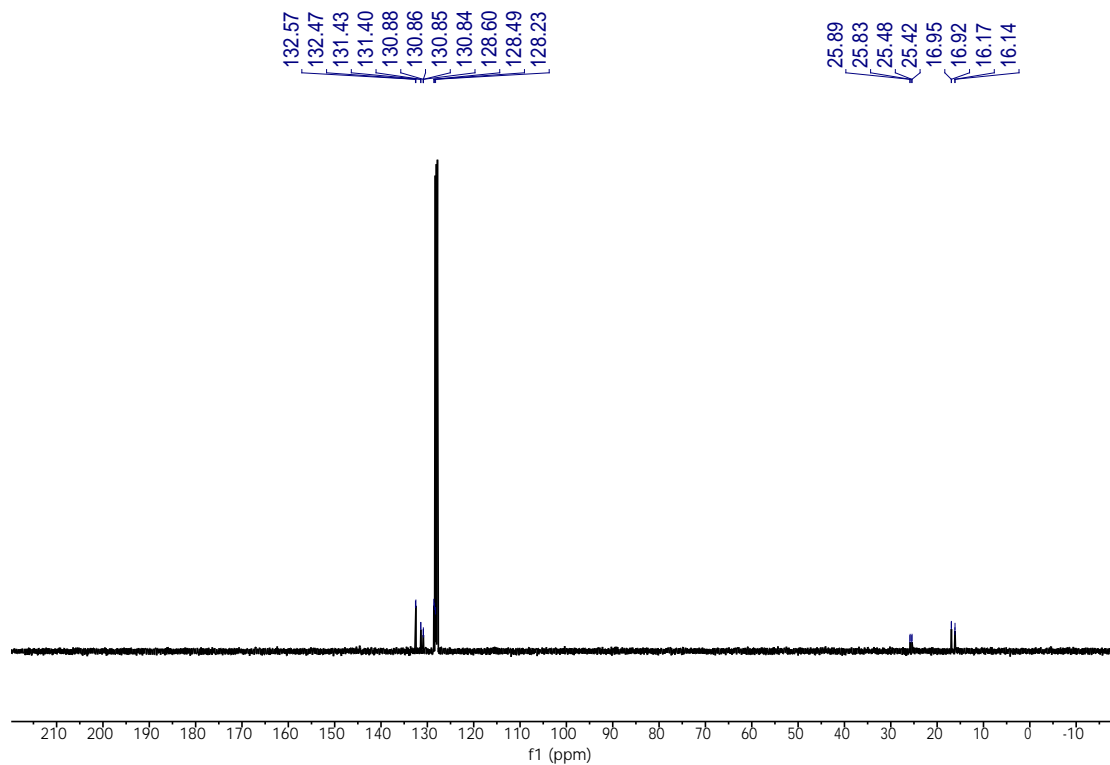

**Figure 27**  $^{31}\text{P}$  NMR spectrum of **14** (100 MHz,  $d_6$ -benzene, 298K)

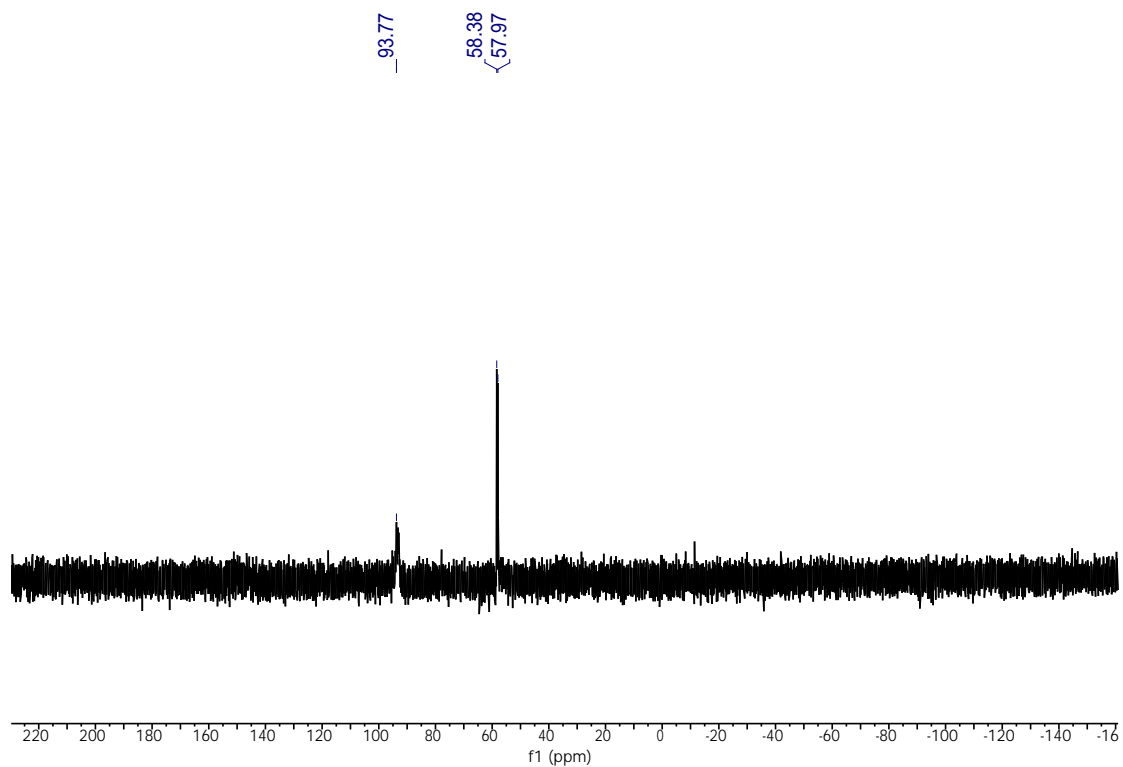

**Figure 28**  $^{11}\text{B}$  NMR spectrum of **14** (100 MHz,  $d_6$ -benzene, 298K)

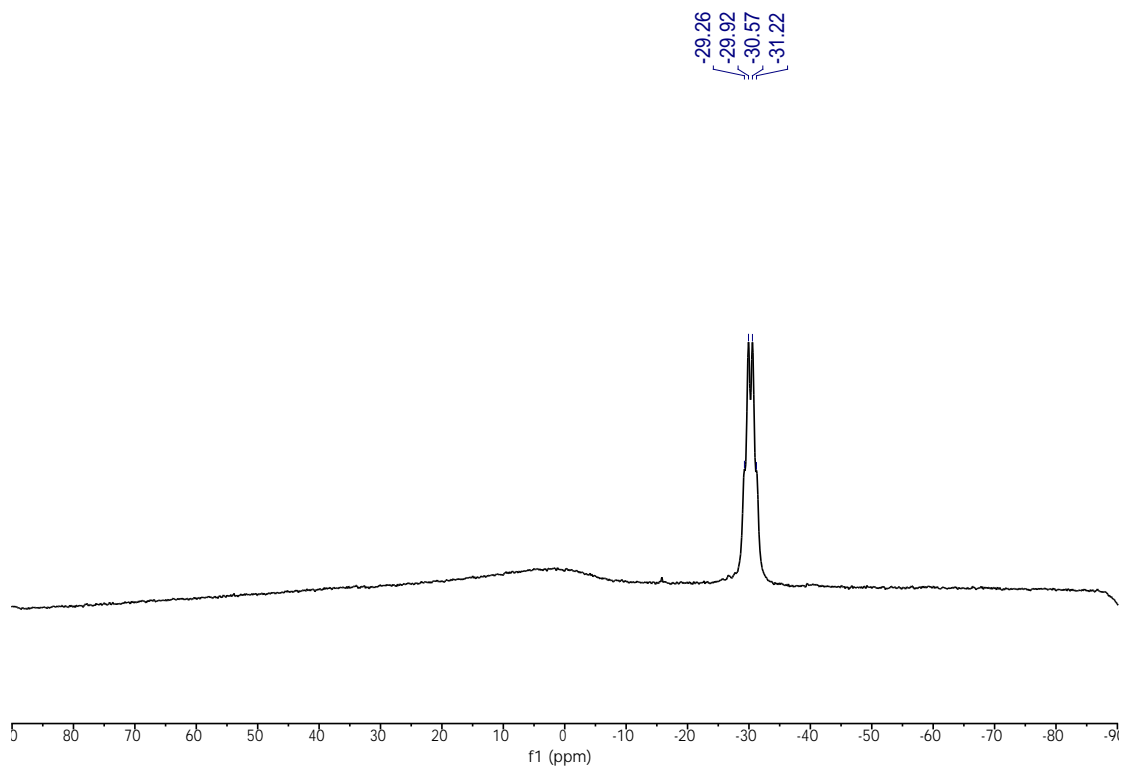

Figure 29  $^1\text{H}$  NMR spectrum of **15** (100 MHz,  $d_6$ -benzene, 298K)

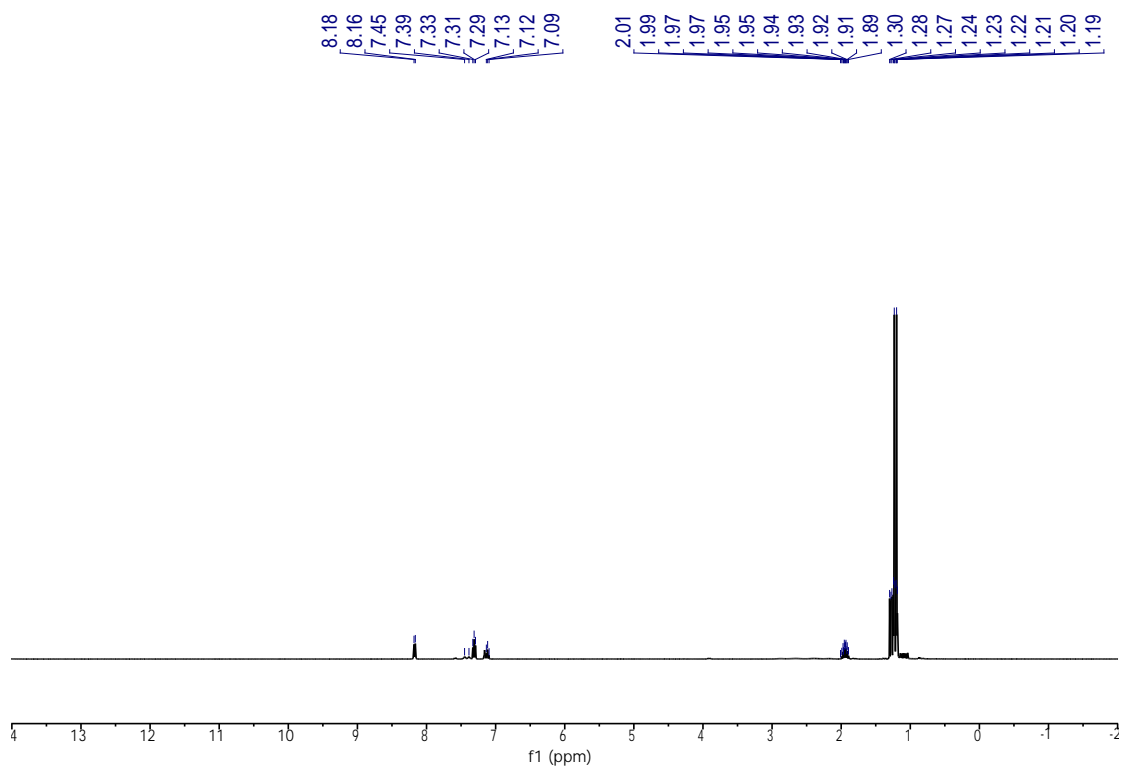

Figure 30  $^{13}\text{C}$  NMR spectrum of **15** (100 MHz,  $d_6$ -benzene, 298K)

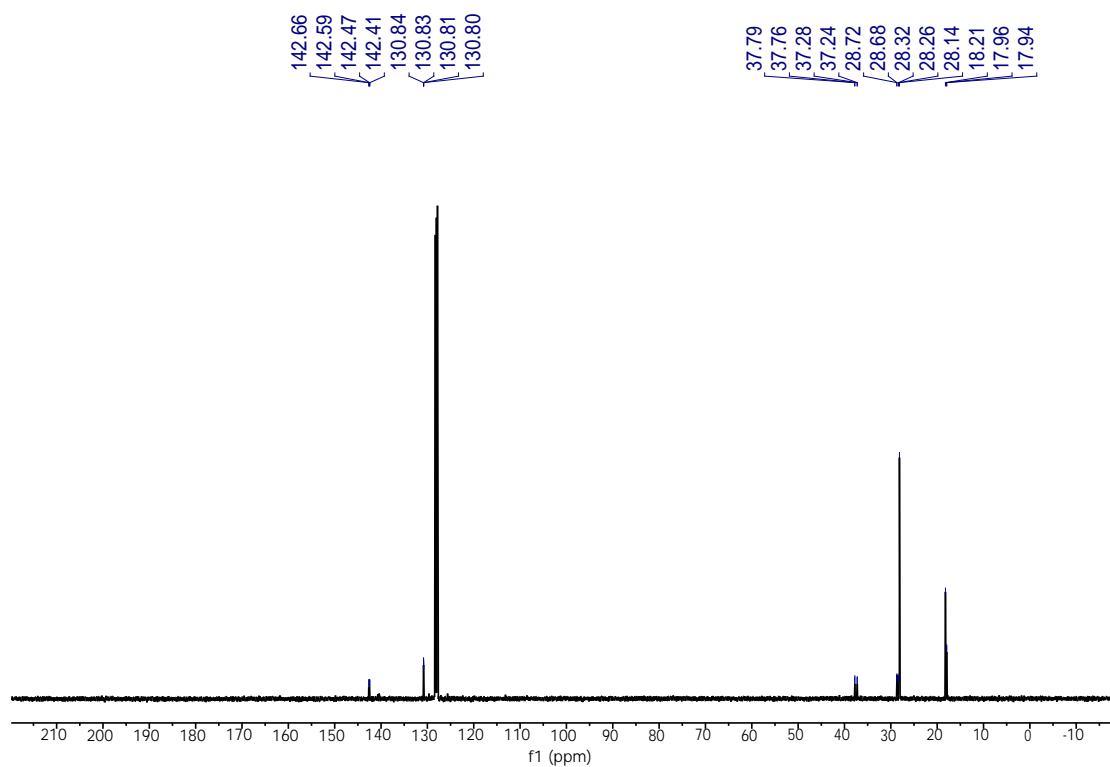



Figure 31  $^{31}\text{P}$  NMR spectrum of **15** (100 MHz,  $d_6$ -benzene, 298K)

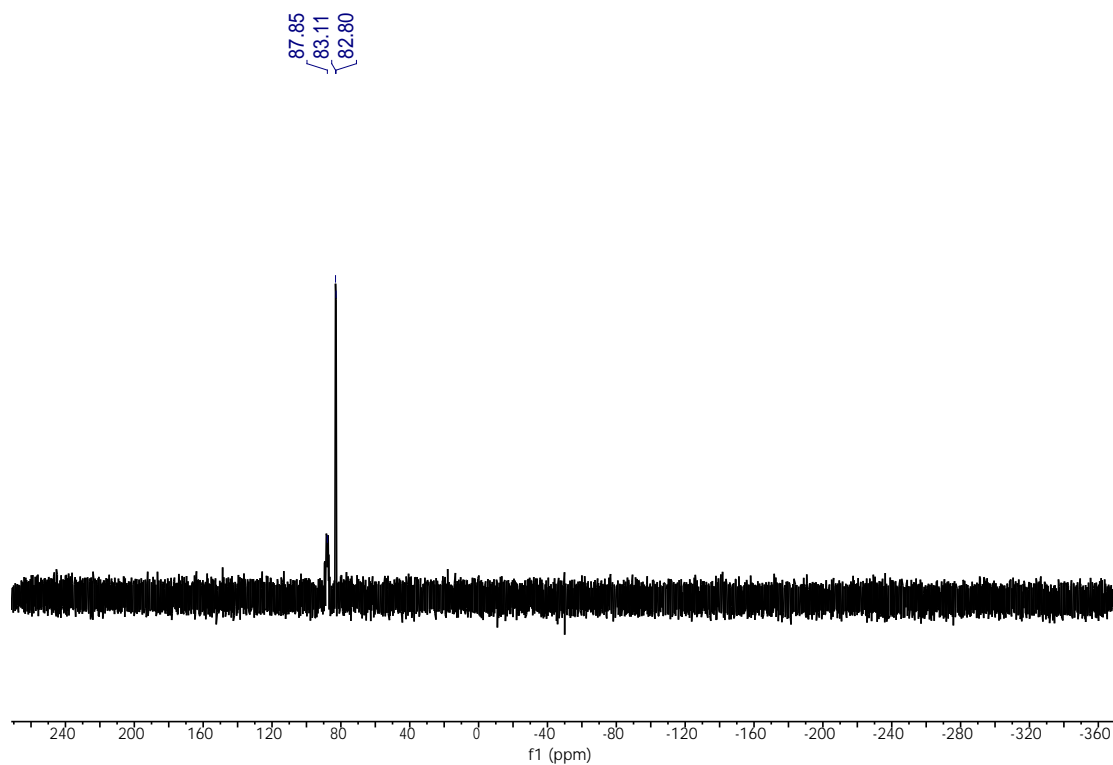

Figure 32  $^{11}\text{B}$  NMR spectrum of **15** (100 MHz,  $d_6$ -benzene, 298K)

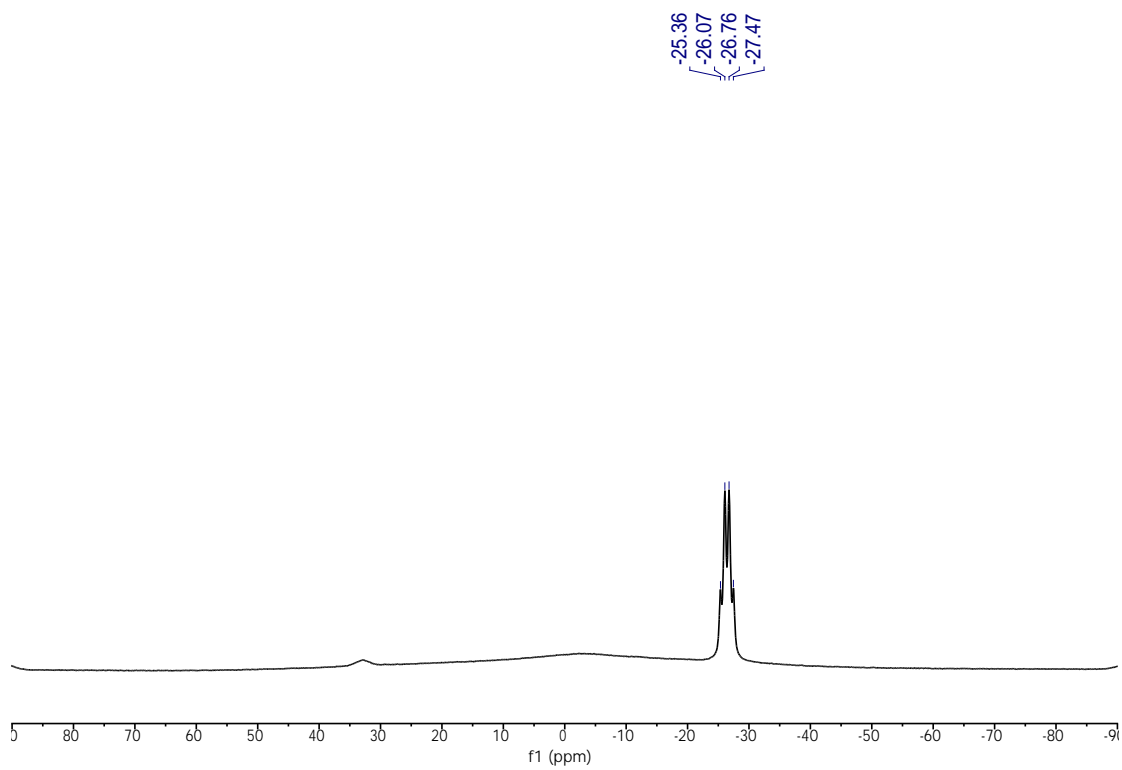

## 2. Crystallographic Details:

**Table 1 Geometric Parameters for Compounds 8-10, 11, 13-15**

| Compound                                              | 8                                                | 9                                                | 10                                               | 11                                               |
|-------------------------------------------------------|--------------------------------------------------|--------------------------------------------------|--------------------------------------------------|--------------------------------------------------|
| Empirical Formula                                     | C <sub>22</sub> H <sub>40</sub> BNP <sub>2</sub> | C <sub>20</sub> H <sub>44</sub> BNP <sub>2</sub> | C <sub>22</sub> H <sub>46</sub> BNP <sub>2</sub> | C <sub>26</sub> H <sub>32</sub> BNP <sub>2</sub> |
| Crystal System                                        | Monoclinic                                       | Triclinic                                        | Triclinic                                        | Monoclinic                                       |
| Space Group                                           | C2/c                                             | P-1                                              | P-1                                              | P2(1)/n                                          |
| a/ Å                                                  | 16.6512(13)                                      | 8.8873(4)                                        | 8.3977(8)                                        | 17.1910(12)                                      |
| b/ Å                                                  | 8.7599(5)                                        | 9.6687(5)                                        | 9.8974(8)                                        | 9.0756(8)                                        |
| c/ Å                                                  | 32.962(2)                                        | 15.5632(8)                                       | 17.1444(14)                                      | 17.2932(13)                                      |
| α/ °                                                  | 90                                               | 85.608(2)                                        | 86.080(5)                                        | 90                                               |
| β/ °                                                  | 97.279(6)                                        | 88.203(2)                                        | 78.918(4)                                        | 111.777(4)                                       |
| γ/ °                                                  | 90                                               | 65.678(2)                                        | 65.594(4)                                        | 90                                               |
| V/ Å <sup>3</sup>                                     | 4769.2(6)                                        | 1215.05(10)                                      | 1273.34(19)                                      | 2505.3                                           |
| Z                                                     | 8                                                | 2                                                | 2                                                | 4                                                |
| T/ K                                                  | 150                                              | 150                                              | 150                                              | 150                                              |
| D <sub>c</sub> / g.cm <sup>-3</sup>                   | 1.090                                            | 1.015                                            | 1.036                                            | 1.143                                            |
| Total data                                            | 5453                                             | 5573                                             | 5791                                             | 5713                                             |
| Unique data                                           | 3775                                             | 4675                                             | 4840                                             | 3823                                             |
| R <sub>int</sub>                                      | 0.0699                                           | 0.0297                                           | 0.0348                                           | 0.0915                                           |
| R <sub>1</sub> [F <sup>2</sup> >2 σ(F <sup>2</sup> )] | 0.0457(3775)                                     | 0.0348(4675)                                     | 0.0363(4840)                                     | 0.0463(3823)                                     |
| wR2 (all data)                                        | 0.1148(5453)                                     | 0.1319(5573)                                     | 0.1316(5791)                                     | 0.1061(5713)                                     |
| GoF                                                   | 1.013                                            | 1.009                                            | 0.985                                            | 1.009                                            |
| min/ max/ eÅ <sup>-3</sup>                            | 0.396/-0.340                                     | 0.354/-0.295                                     | 0.0329/-0.267                                    | 0.396/ -0.340                                    |

|                                                       | <b>13</b>                                        | <b>14</b>                                        | <b>15</b>                                        |
|-------------------------------------------------------|--------------------------------------------------|--------------------------------------------------|--------------------------------------------------|
| Empirical Formula                                     | C <sub>26</sub> H <sub>38</sub> BNP <sub>2</sub> | C <sub>26</sub> H <sub>32</sub> BNP <sub>2</sub> | C <sub>22</sub> H <sub>40</sub> BNP <sub>2</sub> |
| Crystal System                                        | Monoclinic                                       | Triclinic                                        | Monoclinic                                       |
| Space Group                                           | P2(1)/n                                          | P-1                                              | P21/c                                            |
| a/ Å                                                  | 8.9183(5)                                        | 10.3495(7)                                       | 9.7047(7)                                        |
| b/ Å                                                  | 16.6266(8)                                       | 15.2609(11)                                      | 16.3976(9)                                       |
| c/ Å                                                  | 17.4581(10)                                      | 16.9887(12)                                      | 15.2998(10)                                      |
| α/ °                                                  | 90                                               | 108.455(3)                                       | 90                                               |
| β/ °                                                  | 91.698(2)                                        | 104.696(3)                                       | 105.659(4)                                       |
| γ/ °                                                  | 90                                               | 92.445(4)                                        | 90                                               |
| V/ Å <sup>3</sup>                                     | 2587.6(2)                                        | 2439.8(3)                                        | 2344.4(3)                                        |
| Z                                                     | 4                                                | 2                                                | 4                                                |
| T/ K                                                  | 150                                              | 150                                              | 150                                              |
| D <sub>c</sub> / g.cm <sup>-3</sup>                   | 1.123                                            | 1.174                                            | 1.109                                            |
| Total data                                            | 5962                                             | 11157                                            | 5738                                             |
| Unique data                                           | 4443                                             | 9548                                             | 3064                                             |
| R <sub>int</sub>                                      | 0.0494                                           | 0.0380                                           |                                                  |
| R <sub>1</sub> [F <sup>2</sup> >2 σ(F <sup>2</sup> )] | 0.0418(4443)                                     | 0.0395(9548)                                     | 0.0846(3064)                                     |
| wR2 (all data)                                        | 0.1102(5962)                                     | 0.1455(11157)                                    | 0.1711(5738)                                     |
| GoF                                                   | 1.010                                            | 1.148                                            | 1.034                                            |
| min/max/eÅ <sup>-3</sup>                              | 0.422/-0.267                                     | 0.468/-0.359                                     | 0.750/-0.579                                     |
